CORRECTION

# Correction: *De Novo* Transcriptome Analysis for Kentucky Bluegrass Dwarf Mutants Induced by Space Mutation

Lu Gan, Rong Di, Yuehui Chao, Liebao Han, Xingwu Chen, Chao Wu, Shuxia Yin

In [Fig 1](#), [Fig 1B](#) was incorrectly duplicated as [Fig 1A](#). Please view the correct [Fig 1](#) here.

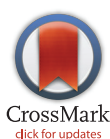

## OPEN ACCESS

**Citation:** Gan L, Di R, Chao Y, Han L, Chen X, Wu C, et al. (2016) Correction: *De Novo* Transcriptome Analysis for Kentucky Bluegrass Dwarf Mutants Induced by Space Mutation. PLoS ONE 11(5): e0155452. doi:10.1371/journal.pone.0155452

**Published:** May 6, 2016

**Copyright:** © 2016 Gan et al. This is an open access article distributed under the terms of the [Creative Commons Attribution License](#), which permits unrestricted use, distribution, and reproduction in any medium, provided the original author and source are credited.

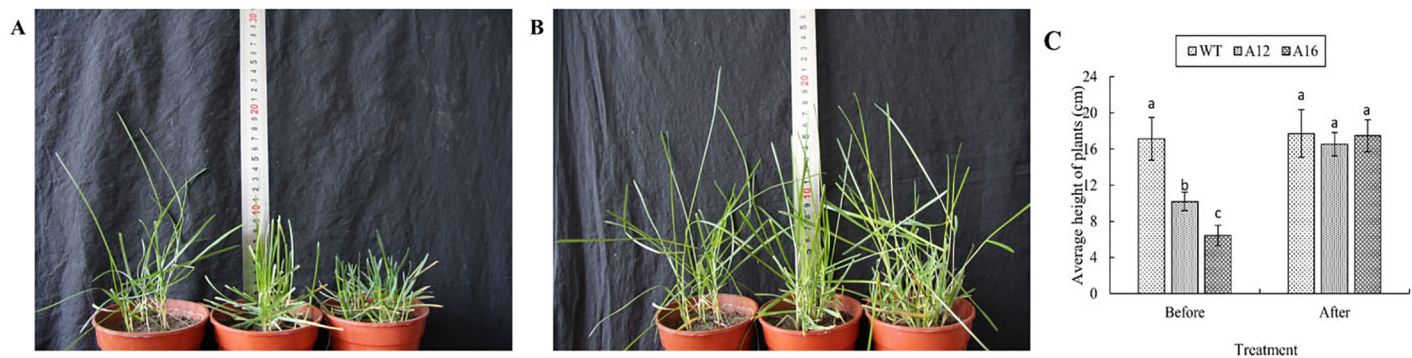

**Fig 1. Plant height comparison before and after GA<sub>3</sub> spraying.** A. WT, A12 and A16 (from left to right) plants without GA<sub>3</sub> spraying. B. WT, A12 and A16 (from left to right) plants 7 days after foliar-spraying with GA<sub>3</sub>. C. Plant height comparison between WT, A12 and A16 before and after GA<sub>3</sub> spraying. Vertical bars on the top indicate standard deviation, and bars with different letters indicate significant difference ( $p < 0.05$ ).

doi:10.1371/journal.pone.0155452.g001

## Reference

1. Gan L, Di R, Chao Y, Han L, Chen X, Wu C, et al. (2016) De Novo Transcriptome Analysis for Kentucky Bluegrass Dwarf Mutants Induced by Space Mutation. PLoS ONE 11(3): e0151768. doi: [10.1371/journal.pone.0151768](https://doi.org/10.1371/journal.pone.0151768) PMID: [27010560](https://pubmed.ncbi.nlm.nih.gov/27010560/)
